# Supplementary material for: Functional and Structural Insights into Human PPARα/δ/γ Subtype Selectivity of Bezafibrate, Fenofibric Acid, and Pemafibrate
Source: MDPI journal article supplement (doi:10.3390/ijms23094726), 2022-04-25
Supplement: s1 [file s1]

## Supplementary Materials

### Functional and Structural Insights into Human PPAR $\alpha$ / $\delta$ / $\gamma$ Subtype Selectivity of Bezafibrate, Fenofibric Acid, and Pemafibrate

Akihiro Honda<sup>1</sup>, Shotaro Kamata<sup>1</sup>, Makoto Akahane<sup>1</sup>, Yui Machida<sup>1</sup>, Kie Uchii<sup>1</sup>, Yui Shiiyama<sup>1</sup>, Yuki Habu<sup>1</sup>, Saeka Miyawaki<sup>1</sup>, Chihiro Kaneko<sup>1</sup>, Takuji Oyama<sup>2</sup>, and Isao Ishii<sup>1,\*</sup>

<sup>1</sup> *Department of Health Chemistry, Showa Pharmaceutical University, Machida, Tokyo 194-8543, Japan*

<sup>2</sup> *Faculty of Life and Environmental Sciences, University of Yamanashi, Kofu, Yamanashi 400-8510, Japan*

#### Contents

**Supplementary Table S1.** Data collection and refinement statistics (molecular replacement)

**Supplementary Figure S1.** Hydrophobic and hydrophilic surfaces of PPAR $\alpha$ / $\delta$ / $\gamma$ -LBD and the three fibrates with van der Waals spheres in cocrystal structures.

**Supplementary Table S1**

Data collection and refinement statistics (molecular replacement) (continues)

|                                                     |                        |                        |                        |
|-----------------------------------------------------|------------------------|------------------------|------------------------|
| Protein                                             | hPPAR $\gamma$ -LBD    | hPPAR $\gamma$ -LBD    | hPPAR $\gamma$ -LBD    |
| Coactivator                                         | SRC1                   | SRC1                   | SRC1                   |
| Ligand                                              | Bezafibrate            | Fenofibric acid        | Pemafibrate            |
| PDB ID                                              | 7WGO                   | 7WGP                   | 7WGQ                   |
| <b>Data collection</b>                              |                        |                        |                        |
| Space group                                         | $P2_12_12_1$           | $P2_12_12_1$           | $P2_12_12_1$           |
| Cell dimensions                                     |                        |                        |                        |
| <i>a</i> , <i>b</i> , <i>c</i> (Å)                  | 49.66, 64.95, 124.32   | 50.16, 64.46, 124.17   | 49.42, 63.32, 123.52   |
| $\alpha$ , $\beta$ , $\gamma$ (°)                   | 90.00, 90.00, 90.00    | 90.00, 90.00, 90.00    | 90.00, 90.00, 90.00    |
| Resolution (Å)                                      | 46.12–2.36 (2.45–2.36) | 46.51–2.53 (2.64–2.53) | 45.89–2.43 (2.52–2.43) |
| <i>R</i> <sub>merge</sub>                           | 0.036 (0.332)          | 0.084 (0.374)          | 0.034 (0.339)          |
| <i>R</i> <sub>pim</sub>                             | 0.016 (0.143)          | 0.036 (0.156)          | 0.014 (0.142)          |
| <i>CC</i> <sub>1/2</sub>                            | 1.000 (0.984)          | 0.998 (0.984)          | 1.000 (0.977)          |
| <i>I</i> / $\sigma$ <i>I</i>                        | 28.7 (4.9)             | 28.7 (4.9)             | 30.4 (5.1)             |
| Completeness (%)                                    | 100.0 (99.9)           | 99.3 (95.4)            | 98.7 (98.0)            |
| Redundancy                                          | 6.5 (6.3)              | 6.3 (6.5)              | 6.6 (6.7)              |
| <b>Refinement</b>                                   |                        |                        |                        |
| Resolution (Å)                                      | 39.449–2.360           | 44.718–2.530           | 38.587–2.430           |
| No. reflections                                     | 17,145                 | 13,870                 | 14,938                 |
| <i>R</i> <sub>work</sub> / <i>R</i> <sub>free</sub> | 0.1949/0.2253          | 0.2089/0.2686          | 0.2067/0.2518          |
| No. atoms                                           |                        |                        |                        |
| Protein                                             | 2,324                  | 2,256                  | 2,311                  |
| Ligand                                              | 25                     | 66                     | 36                     |
| Water                                               | 8                      | 0                      | 3                      |
| <i>B</i> -factors                                   | 58.93                  | 64.81                  | 60.45                  |
| Protein                                             | 58.76                  | 64.61                  | 60.37                  |
| Ligand                                              | 78.61                  | 71.50                  | 66.44                  |
| Water                                               | 46.23                  |                        | 47.32                  |
| Ramachandran plot (%)                               |                        |                        |                        |
| Favored                                             | 92.25                  | 94.49                  | 92.23                  |
| Allowed                                             | 5.28                   | 3.68                   | 4.95                   |
| Outliers                                            | 2.46                   | 1.84                   | 2.83                   |
| R.m.s. deviations                                   |                        |                        |                        |
| Bond lengths (Å)                                    | 0.007                  | 0.005                  | 0.002                  |
| Bond angles (°)                                     | 1.01                   | 0.74                   | 0.51                   |

Values in parentheses are for highest-resolution shell.

**Supplementary Table S1**

Data collection and refinement statistics (molecular replacement) (ends)

|                                     |                        |                        |
|-------------------------------------|------------------------|------------------------|
| Protein                             | hPPAR $\delta$ -LBD    | hPPAR $\delta$ -LBD    |
| Coactivator                         | none                   | none                   |
| Ligand                              | Bezafibrate            | Pemafibrate            |
| PDB ID                              | 7WGL                   | 7WGN                   |
| <b>Data collection</b>              |                        |                        |
| Space group                         | $P2_1$                 | $P2_12_1$              |
| Cell dimensions                     |                        |                        |
| $a, b, c$ (Å)                       | 39.48, 93.81, 96.23    | 37.77, 92.66, 96.76    |
| $\alpha, \beta, \gamma$ (°)         | 90.00, 97.35, 90.00    | 90.00, 90.00, 90.00    |
| Resolution (Å)                      | 47.72–2.09 (2.15–2.09) | 48.38–1.81 (1.85–1.81) |
| $R_{\text{merge}}$                  | 0.036 (0.361)          | 0.032 (0.389)          |
| $R_{\text{pim}}$                    | 0.023 (0.231)          | 0.014 (0.163)          |
| $CC_{1/2}$                          | 0.999 (0.915)          | 1.000 (0.973)          |
| $I / \sigma I$                      | 16.2 (3.0)             | 29.0 (4.4)             |
| Completeness (%)                    | 98.8 (97.6)            | 99.8 (97.4)            |
| Redundancy                          | 3.5 (3.3)              | 6.6 (6.6)              |
| <b>Refinement</b>                   |                        |                        |
| Resolution (Å)                      | 37.972–2.091           | 37.772–1.813           |
| No. reflections                     | 40,615                 | 31,538                 |
| $R_{\text{work}} / R_{\text{free}}$ | 0.1944/0.2258          | 0.2261/0.2548          |
| No. atoms                           |                        |                        |
| Protein                             | 4,156                  | 2,126                  |
| Ligand                              | 90                     | 56                     |
| Water                               | 48                     | 58                     |
| $B$ -factors                        | 49.24                  | 34.37                  |
| Protein                             | 49.19                  | 34.36                  |
| Ligand                              | 54.65                  | 35.82                  |
| Water                               | 43.58                  | 33.48                  |
| Ramachandran plot (%)               |                        |                        |
| Favored                             | 97.41                  | 96.47                  |
| Allowed                             | 2.59                   | 2.75                   |
| Outliers                            | 0.00                   | 0.78                   |
| R.m.s. deviations                   |                        |                        |
| Bond lengths (Å)                    | 0.009                  | 0.002                  |
| Bond angles (°)                     | 0.94                   | 0.49                   |

Values in parentheses are for highest-resolution shell.

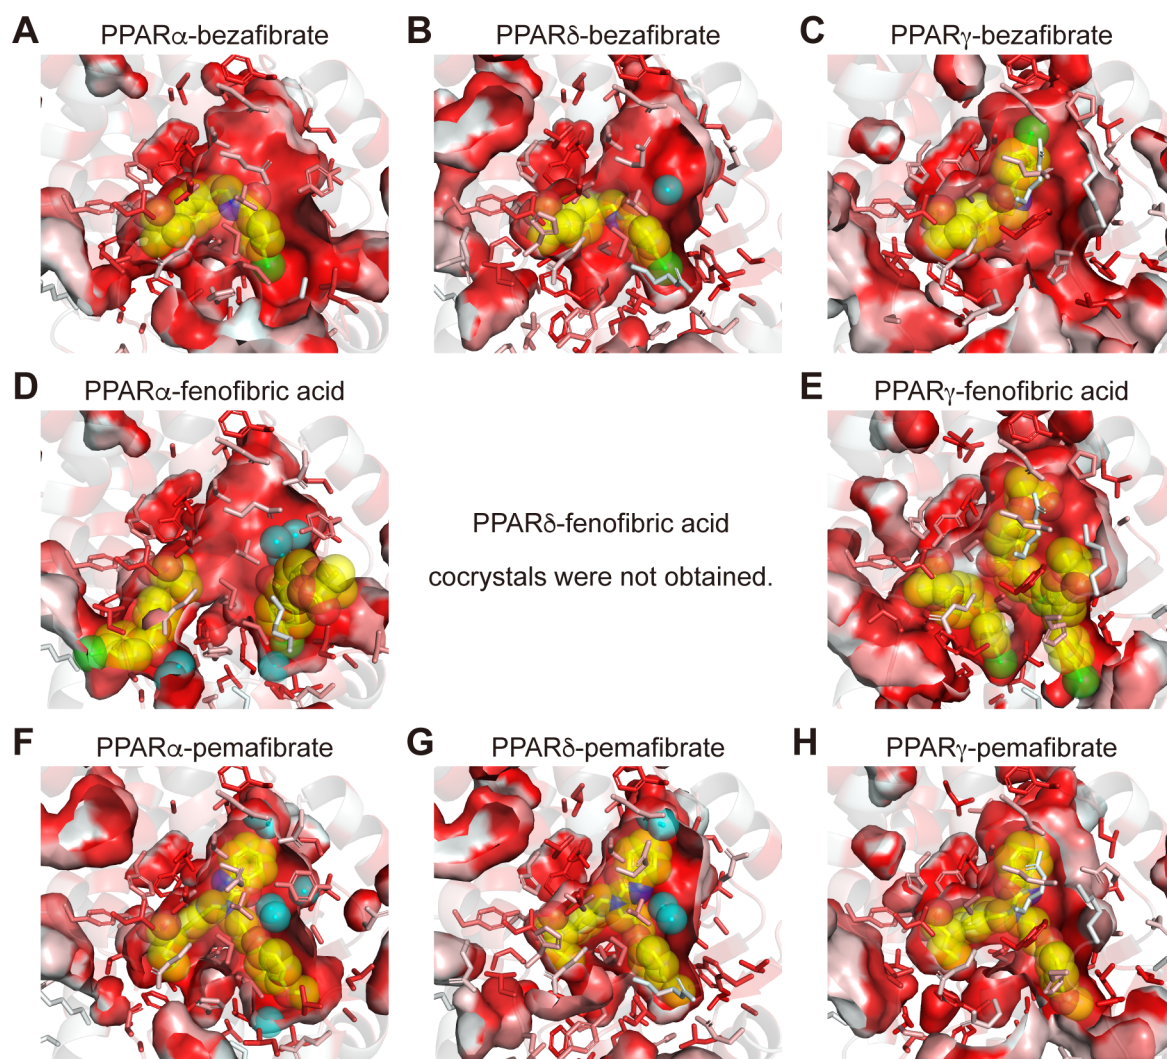

**Supplementary Figure S1.** Hydrophobic and hydrophilic surfaces of PPAR $\alpha$ / $\delta$ / $\gamma$ -LBD and the three fibrates with van der Waals spheres in cocrystal structures. Hydrophobic (*red*) and hydrophilic (*white*) surfaces of PPAR $\alpha$ -LBD (A, D, and F), PPAR $\delta$ -LBD (B and G), and PPAR $\gamma$ -LBD (C, E, and H) and bezafibrate (A–C), fenofibric acid (D and E), and pemaibrate (F–H) in van der Waals spheres (*yellow*) are illustrated. Water molecules and chlorides are shown in *cyan* and *green* spheres, respectively.
